# Supplementary material
Source: publisher figshare collection journal article supplement (https://sage.figshare.com/ndownloader/files/12891128)
Supplement: Supplementary file 1 [file 12891128]

**Stable angina: perception of needs, quality of life and management of patients  
(BRIDGE study) - a multi-national European physician survey**

**Supplementary Materials**

**Supplementary Methods**

**PATIENT RECORD**

A\_AGE \_\_\_(numeric 18-105)\_\_\_ years old                      B\_SEX              Male (1)              Female (2)

C\_BUILD              Underweight      (1)              Average (2)      Overweight (3)      Obese (4)

D\_SOCIO-ECONOMICAL CONDITION      Low/Medium-Low (1)              Medium (2)              Medium-High / High (3)  
Don't know (4)

**E\_ WHAT IS THE PATIENT'S EDUCATIONAL QUALIFICATION?**

|                                              |   |
|----------------------------------------------|---|
| Bachelor's / Doctorate degree                | 1 |
| High school diploma                          | 2 |
| Middle school certificate                    | 3 |
| Elementary school certificate                | 4 |
| Other (specify) ___ (Progr. Open answer) ___ | 5 |
| Don't know                                   | o |

F\_SMOKE      Yes, currently (1)      Yes, in the past (2)              No (3)              Don't know (99)

**G\_ DOES THIS PATIENT PERFORM THE FOLLOWING PHYSICAL ACTIVITIES?**

|                    |                 |         |                              |                            |                                        |
|--------------------|-----------------|---------|------------------------------|----------------------------|----------------------------------------|
| G1_Walking outside | Don't know<br>o | No<br>1 | Yes, Less than once a week 2 | Yes, once a week or more 3 | Yes, but I don't know how frequently 4 |
| G2_Jogging         | Don't know<br>o | No<br>1 | Yes, Less than once a week 2 | Yes, once a week or more 3 | Yes, but I don't know how frequently 4 |
| G3_Swimming        | Don't know<br>o | No<br>1 | Yes, Less than once a week 2 | Yes, once a week or more 3 | Yes, but I don't know how frequently 4 |
| G4_Playing sports  | Don't know<br>o | No<br>1 | Yes, Less than once a week 2 | Yes, once a week or more 3 | Yes, but I don't know how frequently 4 |
| G5_Gymn            | Don't know<br>o | No<br>1 | Yes, Less than once a week 2 | Yes, once a week or more 3 | Yes, but I don't know how frequently 4 |

|                       |  |  |                                 |                               |                                           |
|-----------------------|--|--|---------------------------------|-------------------------------|-------------------------------------------|
| G6_Other<br>(specify) |  |  | Yes, Less than once a<br>week 2 | Yes, once a week or<br>more 3 | Yes, but I don't know how<br>frequently 4 |
|-----------------------|--|--|---------------------------------|-------------------------------|-------------------------------------------|

H\_WORKACTIVITIES Yes (1) No (2)

(If Code 1->):

H1\_DID THIS PATIENT HAVE TO CHANGE HIS/HER TASKS IN HIS/HER OCCUPATIONAL ACTIVITY  
BECAUSE OF STABLE ANGINA?

Yes (1) No (2) Don't Know (99)

(If Code 2->):

H2\_HAS THIS PATIENT HAD TO ABANDON HIS/HER OCCUPATIONAL ACTIVITY BECAUSE OF STABLE  
ANGINA? Yes (1) No (2) Don't Know (99)

I\_HOW WOULD YOU DEFINE THE PATIENT'S CURRENT CONDITION RELATIVE TO HIS STABLE ANGINA?

Not good (1) Fair (2) Good (3) Very good (4)

J\_IN YOUR OPINION TO WHAT DEGREE DOES THIS PATIENT CONSIDER IT IMPORTANT TO BE ABLE TO  
PERFORM THE FOLLOWING ACTIVITIES? TO ANSWER, PLEASE CHOOSE A SCORE FROM 1 (NOT AT  
ALL) TO 5 (EXTREMELY). (random order)

|                                                  |                                      |
|--------------------------------------------------|--------------------------------------|
| Climbing stairs                                  | Score 5->1, with 0.5 fraction + D.K. |
| Walking long distances or in a hurried manner    | Score 5->1, with 0.5 fraction + D.K. |
| Exercise / physical activity                     | Score 5->1, with 0.5 fraction + D.K. |
| Intimate relationships                           | Score 5->1, with 0.5 fraction + D.K. |
| Spirited discussion/Arguments                    | Score 5->1, with 0.5 fraction + D.K. |
| Coping with stressful situations                 | Score 5->1, with 0.5 fraction + D.K. |
| Carrying weights (shopping bags, children, etc.) | Score 5->1, with 0.5 fraction + D.K. |
| Carrying out occupational activity               | Score 5->1, with 0.5 fraction + D.K. |
| Doing housework                                  | Score 5->1, with 0.5 fraction + D.K. |
| Playing Sport (e.g. golf, football, hunting etc) | Score 5->1, with 0.5 fraction + D.K. |
| Hobbies (e.g. dancing, gardening etc.)           | Score 5->1, with 0.5 fraction + D.K. |
| Playing with children                            | Score 5->1, with 0.5 fraction + D.K. |

K\_DOES THIS PATIENT HAVE THE SUPPORT OF A CAREGIVER?

No (1) Yes, a family member (2) Yes, an external caregiver (3) Don't know (99)

L\_ANXIOUS COMPONENT Absent (1) Mild (2) Obvious (3)

M\_DIAGNOSIS OF STABLE ANGINA

Less than 1 year ago (1) 1-2 years ago (2) 3-5 years ago (3) 6-10 years ago (4) More  
than 10 years ago (5)

**N\_ WHICH PHYSICIAN FIRST DIAGNOSED THIS PATIENT WITH STABLE ANGINA?**

|                                                             |   |
|-------------------------------------------------------------|---|
| Primary care physician                                      | 1 |
| Cardiologist                                                | 2 |
| Internist                                                   | 3 |
| Emergency room physician                                    | 4 |
| Other specialist (specify) _____ (Progr. Open answer) _____ | 5 |

**O\_CCS CLASS** (progr: write the explanation for each class as D.2): 1 2 3 4

**P\_ SYMPTOMS OF STABLE ANGINA**

|                               |                |                                   |                |
|-------------------------------|----------------|-----------------------------------|----------------|
| P1_Chest tightness/ heaviness | NO (1) YES (2) | P2_Chest pain                     | NO (1) YES (2) |
| P3_Breathing difficulties     | NO (1) YES (2) | P4_Arrhythmia /Tachycardia        | NO (1) YES (2) |
| P5_Fatigue                    | NO (1) YES (2) | P6_Arm pain                       | NO (1) YES (2) |
| P7_Strong sweat               | NO (1) YES (2) | P8_Nausea / Vomiting              | NO (1) YES (2) |
| P9_Dizziness                  | NO (1) YES (2) | P10_Stress / Anxiety / Depression | NO (1) YES (2) |
| P11_Jaw / Neck pain           | NO (1) YES (2) | P12_Other (Specify ____ OE ____)  | NO (1) YES (2) |

**Q\_CORONARY ANGIOGRAPHY** Performed (1) Never Performed (2)

**R\_ ASSOCIATED DISEASES:**

|                                |                |                                  |                |
|--------------------------------|----------------|----------------------------------|----------------|
| R1_HEART FAILURE               | NO (1) YES (2) | R6_ARRHYTHMIA                    | NO (1) YES (2) |
| R2_PREVIOUS AMI                | NO (1) YES (2) | R7_NEPHROPATHY                   | NO (1) YES (2) |
| R3_HYPERTENSION                | NO (1) YES (2) | R8_HYPERCHOLESTEROLEMIA          | NO (1) YES (2) |
| R4_DIABETES                    | NO (1) YES (2) | R9_COPD                          | NO (1) YES (2) |
| R5_PERIPHERAL ARTERIAL DISEASE | NO (1) YES (2) | R10_OTHER (Specify ____ OE ____) | NO (1) YES (2) |

**S\_AORTOCORONARY BYPASS** Yes (1) No (2)

**T\_ ANGIOPLASTY (PCI)** Yes (1) No (2)

IF T=1

**T1\_HOW LONG AGO WAS THE ANGIOPLASTY (PCI) CARRIED OUT?**

Less than 1 year ago (1) 1-2 years ago (2) 3-5 years ago (3) 6-10 years ago (4) More than 10 years ago (5)

IF T=1 **T2\_IN WHICH CCS CLASS WAS THE PATIENT IN BEFORE THE INTERVENTION?** 1 2 3 4

IF T=1 **T3\_AND AFTER?** 1 2 3 4

**U\_ IN YOUR OPINION, TO WHAT DEGREE DOES STABLE ANGINA LIMIT THIS PATIENT IN PERFORMING THE FOLLOWING ACTIVITIES? TO ANSWER, PLEASE CHOOSE A SCORE FROM 1 (NOT AT ALL) TO 5 (EXTREMELY). TO ALLOW YOU TO RATE THE ITEMS MORE PRECISELY, THE SCALE ALLOWS YOU TO USE ALSO HALF POINTS. (Random order)**

|                                                  |                                      |
|--------------------------------------------------|--------------------------------------|
| Climbing stairs                                  | Score 5->1, with 0.5 fraction + D.K. |
| Walking long distances or in a hurried manner    | Score 5->1, with 0.5 fraction + D.K. |
| Exercise / physical activity                     | Score 5->1, with 0.5 fraction + D.K. |
| Intimate relationships                           | Score 5->1, with 0.5 fraction + D.K. |
| Spirited discussion/Arguments                    | Score 5->1, with 0.5 fraction + D.K. |
| Coping with stressful situations                 | Score 5->1, with 0.5 fraction + D.K. |
| Carrying weights (shopping bags, children, etc.) | Score 5->1, with 0.5 fraction + D.K. |
| Carrying out occupational activity               | Score 5->1, with 0.5 fraction + D.K. |
| Doing housework                                  | Score 5->1, with 0.5 fraction + D.K. |
| Playing Sport (e.g. golf, football, hunting etc) | Score 5->1, with 0.5 fraction + D.K. |
| Hobbies (e.g. dancing, gardening etc.)           | Score 5->1, with 0.5 fraction + D.K. |
| Playing with children                            | Score 5->1, with 0.5 fraction + D.K. |

**V\_ TO WHAT DEGREE DO YOU THINK THAT THIS PATIENT EXPERIENCES THE FOLLOWING CONDITIONS DUE TO STABLE ANGINA? TO ANSWER, PLEASE CHOOSE A SCORE FROM 1 (NOT AT ALL) TO 5 (EXTREMELY).**

|                                            |                                     |
|--------------------------------------------|-------------------------------------|
| Being in a bad mood, irritable             | Score 5-1, with 0.5 fraction + D.K. |
| Feeling uncomfortable with others          | Score 5-1, with 0.5 fraction + D.K. |
| Feeling sad, melancholy, pessimistic       | Score 5-1, with 0.5 fraction + D.K. |
| Carrying out activities without enthusiasm | Score 5-1, with 0.5 fraction + D.K. |
| Having little confidence in myself         | Score 5-1, with 0.5 fraction + D.K. |

**Vx\_ IN YOUR OPINION, TO WHAT EXTENT DOES THIS PATIENT CONSIDER THE FOLLOWING CONDITIONS ATTRIBUTABLE TO HIS/HER SYMPTOMS? TO ANSWER, PLEASE CHOOSE A SCORE FROM 1 (NOT AT ALL) TO 5 (EXTREMELY).**

|                                            |                                      |
|--------------------------------------------|--------------------------------------|
| Being in a bad mood, irritable             | Score 5->1, with 0.5 fraction + D.K. |
| Feeling uncomfortable with others          | Score 5->1, with 0.5 fraction + D.K. |
| Feeling sad, melancholy, pessimistic       | Score 5->1, with 0.5 fraction + D.K. |
| Having little confidence in oneself        | Score 5->1, with 0.5 fraction + D.K. |
| Carrying out activities without enthusiasm | Score 5->1, with 0.5 fraction + D.K. |

**W\_ HOW WORRIED DO YOU BELIEVE THE PATIENT IS ABOUT HAVING A POSSIBLE ANGINA ATTACK? TO ANSWER, PLEASE CHOOSE A SCORE FROM 1 (NOT AT ALL) TO 5 (EXTREMELY). TO ALLOW YOU TO RATE THE ITEMS MORE PRECISELY, THE SCALE ALLOWS YOU TO USE ALSO HALF POINTS.**

Score: \_\_\_\_ Score 5->1, with 0.5 fraction + Don't Know \_\_\_\_

**X\_N. OF REPORTED ANGINA ATTACKS IN A MONTH (AVERAGE NUMBER)**

Less than one (1) One (2) Two (3) Three (4) Four (5) Five-Seven (6) Eight-Ten (7) More than ten (7) D.K (99)

**Y\_ IN YOUR OPINION, WHAT PROPORTION OF ATTACKS DOES THE PATIENT REPORT TO YOU?**

\_\_\_\_\_ %

**Z\_ HOW MANY ATTACKS PER MONTH SHOULD THIS PATIENT HAVE FOR YOU TO CONSIDER HIS/HER CONDITION AS "GOOD QUALITY OF LIFE"? N.\_\_\_\_(numeric from 0 to 999) \_\_\_\_\_attacks / month****AX\_ CURRENT THERAPY FOR STABLE ANGINA (brands with daily dosages)**

Please enter the name of the product (or, if more than one, of the products) for stable angina in the current treatment of this patient, excluding other products that are not related with this disease.

AX1\_ PRODUCT 1: \_\_\_\_ (OE) \_\_\_\_\_

AY1\_ Daily dosage: \_\_\_\_ (numeric 0-10000 – decimals allowed) \_\_\_\_\_ mg

AX2\_ PRODUCT 2 (if it's present): \_\_\_\_\_

AY2\_ Daily dosage: \_\_\_\_\_ mg

AX3\_ PRODUCT 3 (if it's present): \_\_\_\_\_

AY3\_ Daily dosage: \_\_\_\_\_ mg

AX4\_ PRODUCT 4 (if it's present): \_\_\_\_\_

AY4\_ Daily dosage: \_\_\_\_\_ mg

AX5\_ PRODUCT 5 (if it's present): \_\_\_\_\_

AY5\_ Daily dosage: \_\_\_\_\_ mg

AX6\_ PRODUCT 6 (if it's present): \_\_\_\_\_

AY6\_ Daily dosage: \_\_\_\_\_ mg

**BX\_ DOES THIS THERAPY INCLUDE A NITRODERIVATIVE?**

Yes, a long-acting nitroderivative (1) Yes, a short-acting nitroderivative (2) No (3)

**CX\_ HOW LONG HAS THE PATIENT BEEN TAKING THE CURRENT THERAPY?**

I set it during the last visit (1) 1-3 months (2) 4-6 months (3) 7-12 months (4) 1-2 years (5) More than two years (6)

**DX\_ HOW SATISFIED DO YOU BELIEVE THAT THE PATIENT IS WITH THIS TREATMENT? TO ANSWER, PLEASE CHOOSE A SCORE FROM 1 (NOT AT ALL) TO 5 (EXTREMELY). TO ALLOW YOU TO RATE THE ITEMS MORE PRECISELY, THE SCALE ALLOWS YOU TO USE ALSO HALF POINTS.**

Score: \_\_\_\_ Score 5->1, with 0.5 fraction + D.K. \_\_\_\_

**EX\_ IN YOUR OPINION, HOW IMPORTANT IS FOR THIS PATIENT THAT YOU DO THE FOLLOWING THINGS WITH HIM/HER? TO ANSWER, PLEASE CHOOSE A SCORE FROM 1 (NOT AT ALL) TO 5 (EXTREMELY). TO ALLOW YOU TO RATE THE ITEMS MORE PRECISELY, THE SCALE ALLOWS YOU TO USE ALSO HALF POINTS.**

|                                                           | Score                                |
|-----------------------------------------------------------|--------------------------------------|
| Give clear explanations about the disease                 | Score 5->1, with 0.5 fraction + D.K. |
| Give clear explanations about the function of medications | Score 5->1, with 0.5 fraction + D.K. |
| Give practical tips for everyday life                     | Score 5->1, with 0.5 fraction + D.K. |
| Listen attentively                                        | Score 5->1, with 0.5 fraction + D.K. |

|                                                                 |                                      |
|-----------------------------------------------------------------|--------------------------------------|
| Be available for contact for any needs                          | Score 5->1, with 0.5 fraction + D.K. |
| Provide rules to be followed scrupulously                       | Score 5->1, with 0.5 fraction + D.K. |
| Give comfort and psychological support                          | Score 5->1, with 0.5 fraction + D.K. |
| Be competent and updated scientifically                         | Score 5->1, with 0.5 fraction + D.K. |
| Have a positive and encouraging attitude                        | Score 5->1, with 0.5 fraction + D.K. |
| Keep in contact with the other physicians who attend to him/her | Score 5->1, with 0.5 fraction + D.K. |

**FX\_ PATIENT ATTITUDE**

Active collaboration (1)    Passive collaboration (2)    Wary and uncooperative (3)    Depressed and uncooperative (4)

**GX\_ LEVEL OF PATIENT COMPLIANCE TO THERAPY**

Poor (1)    Fair (2)

High (3)

**HX\_ LEVEL OF COMMUNICATION BETWEEN YOU AND THE PATIENT:**

Poor (1)    Fair (2)

High (3)

**IX\_ IN YOUR OPINION, TO WHAT DEGREE DOES THIS PATIENT FEEL THE NEED TO IMPROVE THE FOLLOWING ASPECTS REGARDING HIS/HER STABLE ANGINA? TO ANSWER, PLEASE CHOOSE A SCORE FROM 1 (NOT AT ALL) TO 5 (EXTREMELY).**

|                                                                    |                                      |
|--------------------------------------------------------------------|--------------------------------------|
| Receive more information regarding stable angina                   | Score 5->1, with 0.5 fraction + D.K. |
| Improve his/her everyday life                                      | Score 5->1, with 0.5 fraction + D.K. |
| Have the possibility to carry out activities as before the illness | Score 5->1, with 0.5 fraction + D.K. |
| Have more support from doctors                                     | Score 5->1, with 0.5 fraction + D.K. |
| Have less pill burden                                              | Score 5->1, with 0.5 fraction + D.K. |
| Have lower costs linked to stable angina                           | Score 5->1, with 0.5 fraction + D.K. |
| Have lower side effects due to the treatment                       | Score 5->1, with 0.5 fraction + D.K. |

**JX Approximately, what was the duration of the last follow-up visit with this patient?**    No. \_\_\_\_\_ minutes

**KX How much time passed between your last two visits to this patient for stable angina?**

No. \_\_\_\_\_ ☐ weeks ☐ months    ☐ It was the first visit for stable angina

**Supplementary Table 1.** Physicians' response status analysis.

| Response status                         | All physicians | Target        |              |
|-----------------------------------------|----------------|---------------|--------------|
|                                         |                | Cardiologists | GPs          |
| Invited physicians, n                   | 9068           | 2583          | 6485         |
| Accessed the CAWI survey, n             | 1344 (14.8%)   | 611 (23.7%)   | 733 (11.3%)  |
| Not accepted due to geo-area over quota | 206 (2.3%)     | 54 (2.1%)     | 152 (2.3%)   |
| Not accepted due to screening criteria  | 315 (3.5%)     | 189 (7.3%)    | 126 (1.9%)   |
| Did not complete the survey             | 164 (1.8%)     | 50 (1.9%)     | 114 (1.8%)   |
| Completed the survey                    | 659 (7.3%)     | 318 (12.3%)   | 341 (5.3%)   |
| Did not access the CAWI survey, n       | 7724 (85.2%)   | 1972 (76.3%)  | 5752 (88.7%) |

GP, general practitioner; CAWI, Computer Assisted Web Interviewing.

**Supplementary Table 2.** Characteristics of the participating physicians.

| Characteristics                                                                                                                         | All physicians | Cardiologists             | GPs                        |
|-----------------------------------------------------------------------------------------------------------------------------------------|----------------|---------------------------|----------------------------|
| Physicians, n                                                                                                                           | 659            | 318                       | 341                        |
| Country, n (%)                                                                                                                          |                |                           |                            |
| Italy                                                                                                                                   | 162 (24.6%)    | 80 (25.2%)                | 82 (24.0%)                 |
| Spain                                                                                                                                   | 171 (25.9%)    | 78 (24.5%)                | 93 (27.3%)                 |
| Germany                                                                                                                                 | 163 (24.7%)    | 80 (25.2%)                | 83 (24.3%)                 |
| United Kingdom                                                                                                                          | 163 (24.7%)    | 80 (25.2%)                | 83 (24.3%)                 |
| Years of specialisation                                                                                                                 |                |                           |                            |
| Mean (SD)                                                                                                                               | 19.2 (7.5)     | 16.4 (6.8) <sup>a</sup>   | 21.8 (7.3) <sup>a</sup>    |
| Median (range)                                                                                                                          | 18 (4–38)      | 15 (4–37)                 | 22 (6–38)                  |
| Number of (out-) patients seen in a working week <sup>1</sup>                                                                           |                |                           |                            |
| Mean (SD)                                                                                                                               | 162.3 (130.0)  | 101.4 (92.0) <sup>a</sup> | 219.1 (134.4) <sup>a</sup> |
| Median (range)                                                                                                                          | 130 (15–750)   | 75 (15–500)               | 180 (40–750)               |
| Number of (out-) patients with SA seen in the previous month <sup>2</sup>                                                               |                |                           |                            |
| Mean (SD)                                                                                                                               | 36.8 (47.0)    | 51.3 (59.9) <sup>a</sup>  | 23.4 (23.7) <sup>a</sup>   |
| Median (range)                                                                                                                          | 20 (5–400)     | 30 (5–400)                | 15 (5–200)                 |
| Patients with SA seen and therapy initiated by cardiologist, % <sup>3</sup>                                                             |                |                           |                            |
| Mean (SD)                                                                                                                               | N/A            | 84.1% (17.5)              | N/A                        |
| Median (range)                                                                                                                          | N/A            | 90% (40%–100%)            | N/A                        |
| In percentage terms, how many patients seen by you with SA ....                                                                         |                |                           |                            |
| ...are managed by the specialist (%)                                                                                                    |                |                           |                            |
| Mean (SD)                                                                                                                               | N/A            | N/A                       | 17.6% (21.2)               |
| Median (range)                                                                                                                          | N/A            | N/A                       | 8% (0%–100%)               |
| ...are managed by the specialist and followed by you on a constant basis (You don't change the therapy prescribed by the specialist), % |                |                           |                            |
| Mean (SD)                                                                                                                               | N/A            | N/A                       | 26.7% (25.5)               |
| Median (range)                                                                                                                          | N/A            | N/A                       | 19% (0%–100%)              |



| Characteristics                                                                                                                    | All physicians | Cardiologists | GPs           |
|------------------------------------------------------------------------------------------------------------------------------------|----------------|---------------|---------------|
| ... are managed by the specialist and followed by you on a constant basis (You change the therapy prescribed by the specialist), % |                |               |               |
| Mean (SD)                                                                                                                          | N/A            | N/A           | 23.4% (24.0)  |
| Median (range)                                                                                                                     | N/A            | N/A           | 20% (0%–100%) |
| ...are managed entirely by you, %                                                                                                  |                |               |               |
| Mean (SD)                                                                                                                          | N/A            | N/A           | 32.3% (31.5)  |
| Median (range)                                                                                                                     | N/A            | N/A           | 20% (0%–100%) |

GP, general practitioner; N/A, not applicable; SA, stable angina; SD, standard deviation.

Values given are mean (SD), median (range) or number of patients (%).

<sup>1</sup> Survey question for cardiologists: 'How many outpatients do you see -visit in a working week?'

Survey question for GPs: 'Number of patients seen in a working week.' Cardiologists seeing <15 patients and GPs seeing <40 patients per week were excluded.

<sup>2</sup> Survey question for cardiologists: 'During the last working month, how many of the following types of patients [this included patients with SA] have you seen on an outpatient basis?'

Survey question for GPs: 'During the last working month, how many of the following types of patients [this included patients with SA] have you seen?' Physicians answering <5 patients were excluded.

<sup>3</sup> Survey question: 'In percentage terms, in the following types of patients [this included patients with SA] that you examined how many times do you initiate a therapy personally?'

<sup>a</sup> Statistically significant difference between cardiologists and GPs,  $p < 0.05$  (t-test).

**Supplementary Table 3.** Importance of everyday activities for patients with stable angina perceived by physicians, by age group and time since diagnosis – original values and values weighted for CCS class.

| Activity                     | Importance of everyday activities |                      |        |        |                 |        |        |               |        |        |
|------------------------------|-----------------------------------|----------------------|--------|--------|-----------------|--------|--------|---------------|--------|--------|
|                              | Age group                         | <65 years old        |        |        | 65-74 years old |        |        | ≥75 years old |        |        |
|                              |                                   | Time since diagnosis | ≤2 yrs | >2 yrs | >2 yrs*         | ≤2 yrs | >2 yrs | >2 yrs*       | ≤2 yrs | >2 yrs |
| Climbing stairs              |                                   | 4.06                 | 3.91   | 3.92   | 4.00            | 3.89   | 3.89   | 3.90          | 3.76   | 3.77   |
| Walking long distances       |                                   | 3.78                 | 3.59   | 3.61   | 3.60            | 3.49   | 3.50   | 3.50          | 3.14   | 3.18   |
| Exercise / physical activity |                                   | 3.73                 | 3.44   | 3.46   | 3.50            | 3.25   | 3.26   | 3.36          | 3.08   | 3.17   |
| Intimate relationships       |                                   | 3.86                 | 3.62   | 3.66   | 3.38            | 3.08   | 3.10   | 2.81          | 2.47   | 2.56   |
| Stressful situations         |                                   | 3.74                 | 3.65   | 3.65   | 3.53            | 3.37   | 3.37   | 3.40          | 3.06   | 3.13   |
| Carrying weights             |                                   | 3.75                 | 3.52   | 3.54   | 3.63            | 3.47   | 3.47   | 3.55          | 3.23   | 3.26   |
| Hobbies                      |                                   | 3.67                 | 3.48   | 3.51   | 3.46            | 3.32   | 3.33   | 3.28          | 3.08   | 3.17   |
| Playing with children        |                                   | 3.43                 | 3.17   | 3.19   | 3.37            | 3.16   | 3.17   | 3.12          | 2.91   | 3.00   |

CCS, Canadian Cardiovascular Society; yrs, years.

\* Corrected values were calculated for the groups with diagnosis >2 years by weighting data with the same distribution for CCS class as in the groups with diagnosis ≤2 years.

**Supplementary Figure 1.** Importance of and limitations in everyday activities for patients with stable angina as perceived by physicians, by age group. A) <65 years, B) 65-74 years, C) ≥75 years.

### A) Age group <65 years

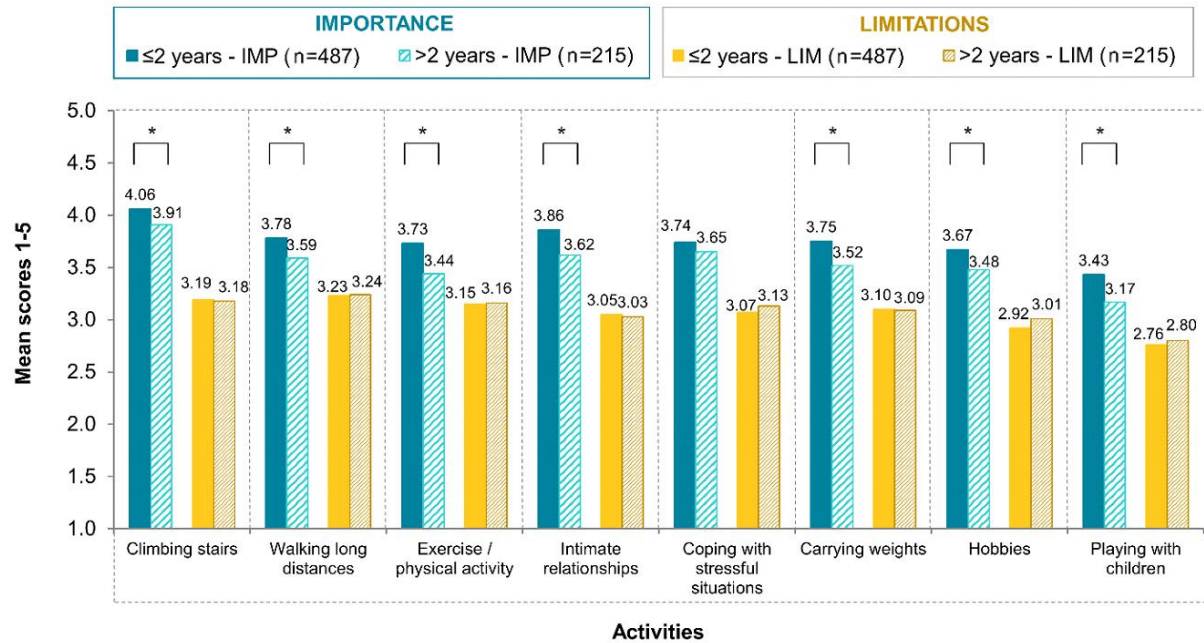

### B) Age group 65-74 years

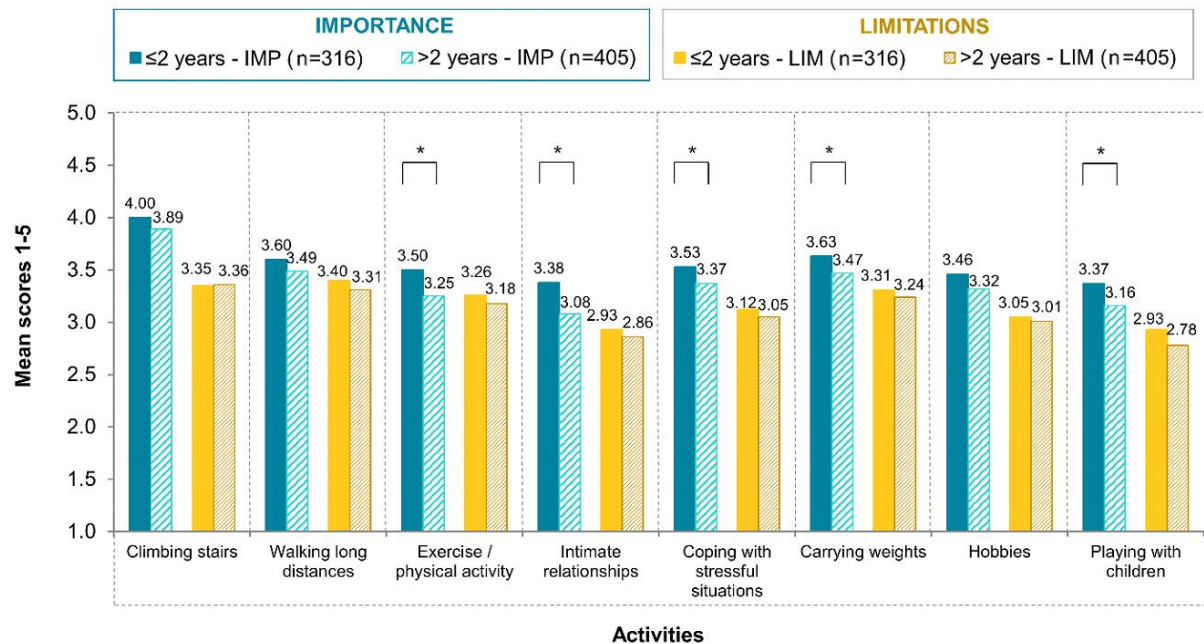

**C) Age group  $\geq 75$  years**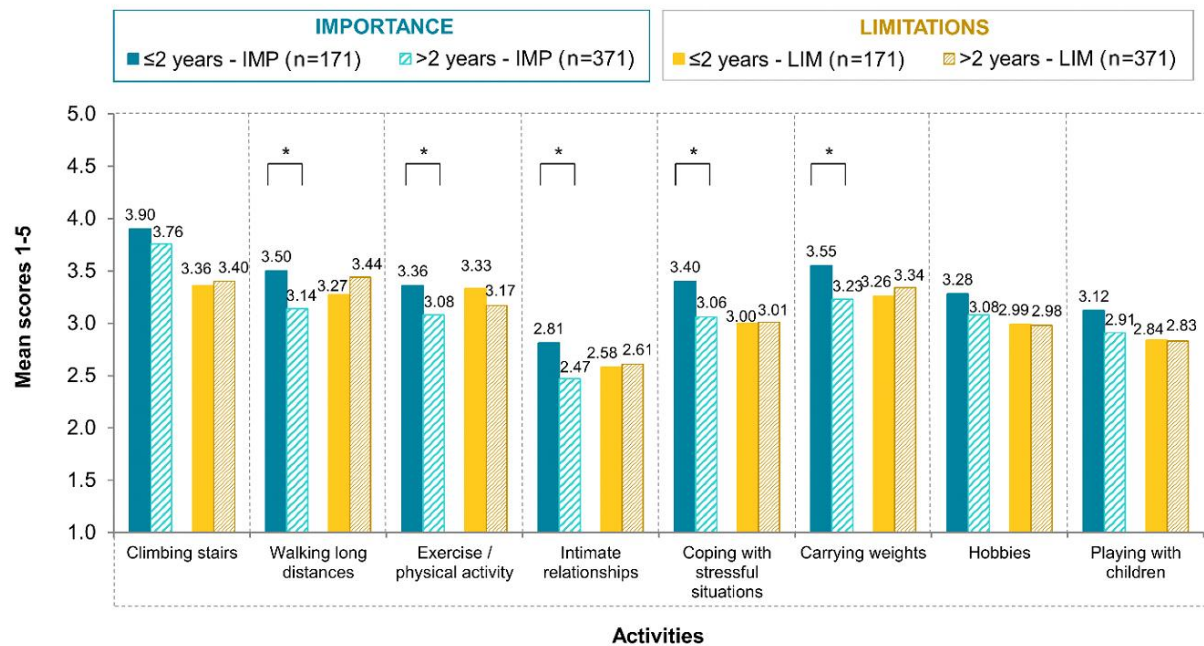

IMP, importance; LIM, limitations.

\* Statistically significant difference between the two groups (t-test),  $p < 0.05$ .

Survey question for importance: 'In your opinion, to what degree does this patient consider it important to be able to perform the following activities? To answer, please choose a score from 1 (Not at all) to 5 (Extremely).'

Survey question for limitations: 'In your opinion, to what degree does stable angina limit this patient in performing the following activities? To answer, please choose a score from 1 (Not at all) to 5 (Extremely). To allow you to rate the items more precisely, the scale allows you to use also half points'.

For both questions, scores could be given from 1–5, with 0.5 fractions. The respondents could also answer, 'Don't know'.
